# Supplementary material
Source: publisher figshare collection journal article supplement (https://tandf.figshare.com/articles/dataset/_/25272675)
Supplement: Supplementary file 1 [file 1]

### SUPPLEMENTAL DATA 3

Raw data collected during the field procedures, regarding the physical variables at the lagoon, the abundance of high and low-calorie food items and the behavioural displays of Chilean flamingos at the Barra. For each flock observed foraging in a certain area, we measured the relative frequency and the mean duration of the four different feeding behaviours observed as well as the mean time of strolling and the mean distance between individuals. PU = Pecking-up; HD = Head-dipping; FT = Feet-trembling; DR = Dredging; ST = Strolling.

| Month | Depth (cm) | Distance from the shore (m) | Salinity (ppt) | High Cal (item/L) | Low Cal (item/mL) | Freq PU (%) | Freq HD (%) | Freq FT (%) | Freq DR (%) | Mean Dur PU (s) | Mean Dur HD (s) | Mean Dur FT (s) | Mean Dur DR (s) | Mean Dur ST (s) | Mean Ind Distance (m) |
|-------|------------|-----------------------------|----------------|-------------------|-------------------|-------------|-------------|-------------|-------------|-----------------|-----------------|-----------------|-----------------|-----------------|-----------------------|
| OUT   | 12.24      | 160.73                      | 32.63          | 14                | 60                | 24.49       | 26.14       | 25.59       | 23.78       | 11.96           | 23.13           | 56.05           | 40.29           | 30.55           | 6.43                  |
| OUT   | 29.56      | 112.56                      | 21.36          | 23                | 121               | 7.59        | 32.54       | 35.95       | 23.93       | 23.40           | 48.45           | 92.56           | 61.84           | 53.89           | 5.27                  |
| OUT   | 20.88      | 105.6                       | 27.95          | 25                | 167               | 13.26       | 28.25       | 20.70       | 37.80       | 35.28           | 59.50           | 100.04          | 72.40           | 36.36           | 6.43                  |
| OUT   | 16.59      | 86.22                       | 22.52          | 25                | 168               | 6.14        | 22.81       | 41.00       | 30.04       | 36.15           | 58.22           | 99.83           | 74.37           | 38.34           | 6.78                  |
| OUT   | 10.33      | 170.73                      | 30.92          | 25                | 139               | 27.16       | 18.77       | 29.36       | 24.71       | 30.42           | 46.91           | 99.52           | 77.25           | 59.38           | 14.87                 |
| OUT   | 14.37      | 197.24                      | 32.2           | 28                | 109               | 13.88       | 28.36       | 26.89       | 30.87       | 22.91           | 39.11           | 111.60          | 85.23           | 48.88           | 16.87                 |
| OUT   | 5.48       | 165.67                      | 21.76          | 29                | 79                | 17.52       | 20.01       | 34.02       | 28.45       | 17.35           | 26.52           | 115.11          | 92.60           | 32.85           | 5.89                  |
| OUT   | 38.06      | 166.84                      | 19.1           | 29                | 122               | 15.84       | 21.12       | 33.53       | 29.51       | 22.35           | 51.90           | 116.74          | 77.61           | 49.60           | 9.87                  |
| OUT   | 15.19      | 197.17                      | 25.39          | 35                | 141               | 23.22       | 26.07       | 37.17       | 13.54       | 30.15           | 49.33           | 139.36          | 107.81          | 52.66           | 8.97                  |
| OUT   | 26.49      | 208.72                      | 29.46          | 35                | 122               | 9.90        | 23.34       | 23.68       | 43.08       | 24.09           | 47.62           | 139.92          | 102.61          | 64.11           | 27.86                 |
| OUT   | 25.69      | 200.89                      | 31.4           | 40                | 50                | 15.00       | 28.51       | 45.37       | 11.12       | 7.65            | 25.01           | 159.68          | 119.38          | 50.27           | 18.91                 |
| OUT   | 16.68      | 94.77                       | 24.53          | 50                | 95                | 25.75       | 21.64       | 27.23       | 25.38       | 19.35           | 35.62           | 198.83          | 156.33          | 32.45           | 6.87                  |
| NOV   | 10.56      | 256.56                      | 40.38          | 6                 | 110               | 5.48        | 32.91       | 29.90       | 31.71       | 23.72           | 38.01           | 24.29           | 14.82           | 34.35           | 9.23                  |
| NOV   | 11.39      | 266.16                      | 25.64          | 25                | 125               | 12.24       | 17.32       | 31.68       | 38.76       | 27.04           | 42.96           | 99.57           | 76.76           | 48.67           | 25.76                 |
| NOV   | 13.66      | 119.67                      | 23.34          | 25                | 142               | 19.21       | 25.09       | 31.15       | 24.56       | 30.61           | 49.07           | 99.68           | 75.72           | 23.23           | 18.75                 |

|     |       |        |       |    |     |       |       |       |       |       |       |        |        |       |       |
|-----|-------|--------|-------|----|-----|-------|-------|-------|-------|-------|-------|--------|--------|-------|-------|
| NOV | 4.47  | 185.78 | 19.99 | 25 | 71  | 11.87 | 26.30 | 33.70 | 28.14 | 15.66 | 23.66 | 99.22  | 79.94  | 28.58 | 19.34 |
| NOV | 12.15 | 152.78 | 38.1  | 27 | 98  | 19.82 | 12.99 | 33.62 | 33.57 | 20.72 | 34.88 | 107.53 | 82.97  | 42.77 | 12.98 |
| NOV | 13.72 | 207.68 | 38.56 | 29 | 110 | 11.31 | 31.44 | 38.90 | 18.35 | 23.24 | 39.18 | 115.53 | 88.81  | 33.06 | 22.34 |
| NOV | 18.53 | 165.96 | 28.04 | 29 | 137 | 14.56 | 20.85 | 34.82 | 29.78 | 28.73 | 49.33 | 115.77 | 86.60  | 57.13 | 14.87 |
| NOV | 10.28 | 175.99 | 25.35 | 30 | 147 | 20.39 | 33.70 | 36.05 | 9.86  | 32.27 | 49.37 | 119.31 | 93.67  | 26.26 | 3.86  |
| NOV | 23.15 | 154.54 | 28    | 32 | 134 | 12.74 | 21.49 | 38.49 | 27.28 | 27.35 | 50.11 | 127.88 | 94.31  | 55.37 | 16.76 |
| NOV | 15.8  | 167.05 | 25.49 | 35 | 145 | 9.88  | 41.05 | 23.78 | 25.28 | 30.98 | 50.80 | 139.39 | 107.53 | 36.61 | 21.27 |
| NOV | 19.54 | 238.44 | 36.76 | 42 | 64  | 10.65 | 29.29 | 42.44 | 17.62 | 11.79 | 27.07 | 167.30 | 128.77 | 47.88 | 17.65 |
| DEC | 19.2  | 341.66 | 32.57 | 38 | 79  | 18.85 | 9.63  | 37.59 | 33.93 | 15.29 | 31.59 | 151.44 | 115.81 | 64.60 | 20.21 |
| DEC | 18.45 | 166.46 | 28.1  | 38 | 128 | 16.98 | 12.85 | 39.10 | 31.07 | 26.67 | 46.51 | 151.40 | 116.15 | 70.56 | 4.78  |
| DEC | 8.38  | 155.85 | 34.19 | 39 | 82  | 26.56 | 1.77  | 44.71 | 26.96 | 17.60 | 28.52 | 154.86 | 124.07 | 73.56 | 5.98  |
| DEC | 7.16  | 223.38 | 27.85 | 41 | 68  | 7.61  | 0.54  | 53.27 | 38.58 | 14.57 | 23.73 | 162.72 | 131.19 | 52.58 | 8.64  |
| DEC | 22.58 | 205.82 | 33.12 | 41 | 62  | 25.85 | 4.72  | 39.98 | 29.46 | 10.87 | 27.57 | 163.49 | 124.09 | 65.16 | 5.28  |
| DEC | 1.62  | 239.71 | 32.14 | 45 | 79  | 18.82 | 3.45  | 49.82 | 27.92 | 17.93 | 25.09 | 178.28 | 146.85 | 61.49 | 14.61 |
| DEC | 27.7  | 234.31 | 33.71 | 51 | 158 | 14.03 | 1.93  | 48.90 | 35.14 | 32.19 | 59.23 | 203.35 | 154.54 | 68.48 | 5.98  |
| DEC | 33.8  | 171.49 | 24.13 | 53 | 157 | 12.62 | 5.93  | 53.55 | 27.90 | 31.04 | 61.18 | 211.57 | 158.29 | 73.40 | 2.32  |
| DEC | 13.8  | 166.24 | 32.03 | 69 | 196 | 5.79  | 4.55  | 52.39 | 37.27 | 43.01 | 65.87 | 273.93 | 219.97 | 65.41 | 15.86 |
| ABR | 34.3  | 163.28 | 20.61 | 11 | 141 | 10.62 | 1.45  | 52.52 | 35.40 | 27.29 | 56.40 | 45.28  | 20.30  | 40.94 | 10.34 |
| ABR | 24.59 | 115.93 | 22.79 | 24 | 141 | 18.69 | 4.14  | 50.28 | 26.89 | 28.74 | 52.81 | 96.27  | 67.41  | 62.44 | 4.67  |
| ABR | 39.49 | 192.41 | 31.57 | 27 | 113 | 19.60 | 6.70  | 45.92 | 27.78 | 20.07 | 49.64 | 108.89 | 70.39  | 66.23 | 22.12 |
| ABR | 34.44 | 86.88  | 11.3  | 34 | 124 | 14.36 | 13.89 | 43.42 | 28.34 | 23.35 | 51.18 | 136.36 | 95.68  | 52.26 | 9.47  |
| ABR | 41.03 | 93.33  | 19.67 | 35 | 111 | 16.44 | 4.27  | 46.67 | 32.63 | 19.38 | 49.59 | 140.65 | 95.93  | 75.39 | 2.98  |
| ABR | 24.31 | 129.21 | 25.35 | 38 | 155 | 13.46 | 6.78  | 46.38 | 33.37 | 32.00 | 57.04 | 151.70 | 113.46 | 74.09 | 3.01  |
| MAI | 33.9  | 7.65   | 17.19 | 9  | 126 | 13.26 | 27.64 | 36.39 | 22.71 | 23.90 | 51.60 | 37.34  | 13.93  | 50.42 | 19.26 |
| MAI | 56.53 | 90.85  | 28.74 | 10 | 155 | 16.91 | 29.24 | 31.91 | 21.94 | 27.17 | 68.97 | 42.43  | 6.80   | 38.37 | 8.12  |
| MAI | 47.21 | 23.53  | 20.55 | 21 | 234 | 25.28 | 2.01  | 45.67 | 27.04 | 46.74 | 90.01 | 85.52  | 47.16  | 32.56 | 20.98 |
| MAI | 31.83 | 113.14 | 19.41 | 23 | 266 | 18.65 | 17.89 | 34.41 | 29.06 | 56.41 | 94.24 | 92.67  | 60.80  | 32.37 | 8.96  |
| MAI | 37.11 | 193.79 | 24.08 | 25 | 218 | 0.46  | 19.98 | 45.80 | 33.76 | 44.57 | 81.31 | 100.86 | 64.93  | 40.45 | 16.85 |

|     |       |        |       |    |     |       |       |       |       |       |        |        |       |       |       |
|-----|-------|--------|-------|----|-----|-------|-------|-------|-------|-------|--------|--------|-------|-------|-------|
| MAI | 47.96 | 89.07  | 18.18 | 28 | 149 | 13.28 | 36.02 | 32.50 | 18.21 | 27.08 | 63.94  | 113.28 | 69.78 | 51.24 | 5.73  |
| MAI | 54.55 | 108.49 | 23.16 | 36 | 201 | 8.51  | 27.06 | 46.38 | 18.05 | 38.05 | 82.49  | 145.29 | 92.99 | 49.45 | 7.27  |
| JUN | 44    | 111.45 | 18.86 | 13 | 227 | 18.14 | 4.04  | 47.57 | 30.25 | 45.61 | 86.65  | 53.68  | 22.40 | 78.90 | 21.13 |
| JUN | 44.92 | 76.17  | 17.29 | 14 | 167 | 19.53 | 6.41  | 50.82 | 23.23 | 31.67 | 68.39  | 57.69  | 25.26 | 57.53 | 9.43  |
| JUN | 44.99 | 140.99 | 22.04 | 16 | 190 | 2.48  | 8.29  | 49.03 | 40.20 | 36.95 | 75.55  | 65.61  | 31.78 | 61.35 | 8.23  |
| JUN | 34.06 | 85.93  | 25.95 | 16 | 208 | 11.99 | 10.44 | 50.48 | 27.09 | 42.73 | 77.08  | 65.06  | 36.81 | 70.31 | 4.98  |
| JUN | 44.65 | 100.72 | 25.62 | 16 | 173 | 35.06 | 6.32  | 32.59 | 26.03 | 33.09 | 70.15  | 65.59  | 31.94 | 63.85 | 3.56  |
| JUN | 44.75 | 138.92 | 18.7  | 19 | 209 | 11.28 | 8.62  | 39.68 | 40.42 | 41.36 | 81.35  | 77.48  | 41.74 | 96.06 | 8.24  |
| JUN | 51.53 | 136.03 | 27.22 | 22 | 139 | 19.76 | 0.55  | 53.71 | 25.98 | 24.24 | 62.16  | 89.70  | 48.46 | 70.87 | 6.43  |
| JUN | 46.75 | 77.5   | 22.69 | 24 | 186 | 18.29 | 11.01 | 36.56 | 34.14 | 35.77 | 74.96  | 97.38  | 57.22 | 53.92 | 20.21 |
| JUN | 19.76 | 103.39 | 15.85 | 27 | 151 | 18.23 | 2.33  | 48.27 | 31.16 | 31.77 | 54.12  | 107.91 | 79.47 | 56.77 | 21.23 |
| JUN | 33.84 | 108.08 | 18.71 | 27 | 242 | 10.01 | 4.23  | 50.91 | 34.85 | 50.58 | 87.54  | 108.61 | 72.99 | 66.88 | 19.23 |
| JUL | 73.56 | 70.43  | 32.98 | 11 | 175 | 4.59  | 17.93 | 47.26 | 30.23 | 29.22 | 81.47  | 47.24  | 2.24  | 72.17 | 15.98 |
| JUL | 72.75 | 56.01  | 15.16 | 12 | 144 | 15.83 | 6.66  | 44.94 | 32.57 | 22.21 | 71.56  | 51.16  | 5.90  | 76.27 | 5.43  |
| JUL | 69.55 | 48.9   | 27.6  | 13 | 136 | 13.27 | 10.39 | 45.39 | 30.95 | 20.85 | 67.89  | 54.96  | 10.65 | 67.15 | 18.98 |
| JUL | 67.58 | 72.74  | 14.99 | 14 | 172 | 23.78 | 9.38  | 35.29 | 31.55 | 29.42 | 78.32  | 58.82  | 14.83 | 74.90 | 6.89  |
| JUL | 61.87 | 108.57 | 19.21 | 17 | 180 | 14.60 | 1.05  | 51.10 | 33.25 | 32.12 | 78.69  | 70.41  | 27.30 | 67.33 | 9.17  |
| JUL | 53.53 | 116.67 | 15    | 17 | 215 | 15.50 | 1.78  | 60.90 | 21.82 | 41.42 | 86.46  | 70.00  | 31.14 | 60.30 | 8.90  |
| JUL | 66.22 | 112.66 | 16.88 | 19 | 197 | 13.35 | 13.11 | 44.60 | 28.95 | 35.38 | 85.57  | 78.55  | 31.86 | 71.75 | 2.76  |
| JUL | 77.06 | 95.41  | 22.25 | 23 | 210 | 19.46 | 8.06  | 39.04 | 33.43 | 36.74 | 93.61  | 94.93  | 39.99 | 65.80 | 11.23 |
| JUL | 71.8  | 100.05 | 14.68 | 25 | 191 | 17.42 | 14.58 | 45.52 | 22.48 | 33.16 | 85.78  | 102.59 | 48.97 | 90.16 | 10.35 |
| JUL | 42.44 | 67.72  | 17.09 | 25 | 213 | 12.31 | 0.19  | 57.01 | 30.49 | 42.62 | 81.73  | 101.12 | 62.48 | 76.37 | 5.72  |
| JUL | 77.9  | 64.43  | 22.13 | 31 | 305 | 21.24 | 7.66  | 44.05 | 27.04 | 58.47 | 123.37 | 126.66 | 65.85 | 59.71 | 3.87  |
| AGO | 3.43  | 89.95  | 27.45 | 19 | 153 | 16.39 | 8.32  | 42.47 | 32.82 | 34.68 | 48.70  | 75.41  | 60.74 | 68.20 | 5.87  |
| AGO | 60.56 | 78.5   | 16.53 | 20 | 139 | 23.29 | 4.09  | 45.07 | 27.54 | 22.89 | 65.50  | 82.23  | 37.74 | 30.87 | 15.32 |
| AGO | 33.12 | 76.09  | 15.55 | 21 | 138 | 13.48 | 9.23  | 46.02 | 31.27 | 26.77 | 55.03  | 84.82  | 53.64 | 55.11 | 10.11 |
| AGO | 42.14 | 89.31  | 13.6  | 21 | 171 | 28.50 | 11.99 | 33.91 | 25.61 | 33.01 | 68.60  | 85.27  | 49.50 | 52.60 | 2.21  |
| AGO | 79.42 | 54.87  | 21.54 | 22 | 110 | 12.77 | 5.49  | 51.61 | 30.13 | 13.39 | 63.49  | 91.09  | 35.63 | 89.56 | 3.85  |

|     |       |        |       |    |     |       |       |       |       |       |       |        |        |       |       |
|-----|-------|--------|-------|----|-----|-------|-------|-------|-------|-------|-------|--------|--------|-------|-------|
| AGO | 13.41 | 56.02  | 27.14 | 25 | 112 | 11.84 | 12.22 | 49.14 | 26.81 | 23.75 | 39.68 | 99.67  | 75.83  | 62.30 | 7.85  |
| AGO | 77.18 | 81.95  | 26.11 | 26 | 110 | 11.05 | 5.57  | 49.54 | 33.85 | 13.72 | 62.66 | 106.82 | 49.78  | 77.08 | 3.21  |
| AGO | 74.89 | 102.08 | 11.3  | 27 | 156 | 25.73 | 10.61 | 35.14 | 28.52 | 24.65 | 76.07 | 110.66 | 54.11  | 46.85 | 23.45 |
| AGO | 31.1  | 104.6  | 15.4  | 29 | 176 | 13.98 | 15.30 | 47.91 | 22.81 | 31.25 | 47.89 | 127.98 | 68.92  | 63.12 | 12.50 |
| AGO | 37.89 | 64.72  | 10.2  | 30 | 111 | 25.38 | 12.67 | 35.78 | 26.17 | 19.85 | 48.43 | 120.69 | 80.97  | 58.15 | 22.34 |
| AGO | 12.46 | 51     | 17.17 | 31 | 101 | 15.12 | 4.97  | 47.53 | 32.38 | 21.36 | 35.92 | 123.38 | 95.95  | 71.31 | 19.24 |
| AGO | 65.58 | 63.17  | 17.23 | 31 | 124 | 3.52  | 1.33  | 63.75 | 31.41 | 18.68 | 62.70 | 126.04 | 71.51  | 60.84 | 18.43 |
| AGO | 88.67 | 81.43  | 18.21 | 32 | 156 | 19.83 | 3.77  | 44.88 | 31.51 | 22.58 | 81.17 | 131.15 | 64.17  | 58.30 | 17.98 |
| SET | 23.52 | 99.41  | 12.33 | 15 | 120 | 13.49 | 22.19 | 42.17 | 22.15 | 24.07 | 45.90 | 60.58  | 38.38  | 26.32 | 8.25  |
| SET | 71.04 | 117.4  | 20.68 | 18 | 132 | 23.43 | 22.60 | 32.21 | 21.77 | 19.70 | 67.20 | 74.83  | 26.36  | 37.93 | 19.48 |
| SET | 8.17  | 74.1   | 28.4  | 20 | 41  | 15.91 | 25.21 | 40.17 | 18.71 | 8.20  | 15.73 | 79.61  | 61.84  | 40.82 | 9.15  |
| SET | 39.61 | 102.48 | 30    | 24 | 77  | 6.12  | 20.27 | 37.40 | 36.21 | 11.77 | 38.53 | 97.02  | 60.50  | 32.78 | 3.87  |
| SET | 23.62 | 123.42 | 20.46 | 24 | 76  | 27.41 | 24.25 | 22.10 | 26.24 | 13.94 | 32.30 | 96.22  | 67.85  | 57.20 | 7.98  |
| SET | 21.21 | 101.43 | 24.21 | 26 | 87  | 21.29 | 17.33 | 34.57 | 26.81 | 10.76 | 42.12 | 105.30 | 51.21  | 48.52 | 7.54  |
| SET | 75.01 | 144.97 | 31.84 | 25 | 87  | 20.73 | 18.52 | 36.11 | 24.65 | 8.76  | 54.72 | 102.75 | 47.50  | 35.46 | 5.37  |
| SET | 18.54 | 117.49 | 14.27 | 26 | 112 | 15.71 | 22.67 | 30.49 | 31.13 | 22.98 | 41.58 | 103.89 | 76.75  | 62.55 | 25.36 |
| SET | 25.79 | 158.24 | 32.72 | 30 | 51  | 26.64 | 12.97 | 40.06 | 20.34 | 7.86  | 25.35 | 120.09 | 86.54  | 52.38 | 3.87  |
| SET | 89.65 | 101.13 | 39.79 | 30 | 113 | 12.53 | 20.92 | 39.42 | 27.12 | 12.54 | 68.20 | 123.28 | 57.16  | 38.76 | 3.89  |
| SET | 9.08  | 115.63 | 25.5  | 30 | 97  | 29.26 | 13.72 | 37.92 | 19.10 | 20.95 | 33.43 | 119.25 | 94.22  | 42.38 | 2.87  |
| SET | 41.06 | 84.21  | 28.58 | 42 | 122 | 5.72  | 21.53 | 44.48 | 28.28 | 21.90 | 53.01 | 168.37 | 118.87 | 37.27 | 9.87  |

---
