# Supplementary material
Source: publisher figshare collection journal article supplement (https://tandf.figshare.com/articles/dataset/_/25272675)
Supplement: Supplementary file 3 [file 1]

## SUPPLEMENTAL DATA 2

Statistics related to the best Generalized Linear Mixed Models (GLMMs) for predicting the foraging behavioral plasticity of Chilean Flamingos at the Barra of the Lagoa do Peixe National Park, southern Brazil, during the study, using different combinations of environmental variables as predictors, for the four foraging behaviors observed (a – relative frequency and b – mean duration), for the strolling mean duration (c) and the mean individual distance in within the flock (d). K = the number of parameters estimated plus intercept; AIC = Akaike’s Information Criterion score;  $w_i$  = AIC weights; z-value = statistic score; N = the number of observations; Var = Variance; SD = standard deviation; SE = standard error; \*\*\* = P-value lesser than 0.001; \*\* = P-value lesser than 0.05. PU = Pecking-up; HD = Head-dipping; FT = Feet-trembling; DR = Dredging; ST = Strolling; RE = Random effects.

### (a) Relative behavioral frequency

| Model                                                                  |            |       |         |         |
|------------------------------------------------------------------------|------------|-------|---------|---------|
| PU Frequency ~ Low calorie food abundance + water depth + (RE: Months) |            |       |         |         |
| Random effects                                                         |            | N     | Var     | SD      |
| Month                                                                  |            | 91    | 7.389   | 2.711   |
| Fixed effects                                                          | Estimative | SE    | z-value | P-value |
| Intercept                                                              | 2.5606     | 0.795 | 3.220   | ***     |
| Low calorie food abundance                                             | 1.0717     | 0.606 | 1.623   | ***     |
| Water depth                                                            | - 0.8562   | 0.272 | - 3.167 | **      |

### Model

HD Frequency ~ Low calorie food abundance + water depth + (RE: Months)

|                            |            |       |         |                 |
|----------------------------|------------|-------|---------|-----------------|
| Random effects             |            | N     | Var     | SD              |
| Month                      |            | 91    | 8.135   | 12.967          |
| Fixed effects              | Estimative | SE    | z-value | <i>P</i> -value |
| Intercept                  | 1.67227    | 0.750 | 2.229   | ***             |
| Low calorie food abundance | 1.60836    | 0.854 | 1.903   | **              |
| Water depth                | - 0.92871  | 0.304 | - 3.054 | **              |

Model

| FT Frequency ~ High calorie food abundance + water depth + (RE: Months) |            |       |         |                 |
|-------------------------------------------------------------------------|------------|-------|---------|-----------------|
| Random effects                                                          |            | N     | Var     | SD              |
| Month                                                                   |            | 91    | 7.051   | 14.05           |
| Fixed effects                                                           | Estimative | SE    | z-value | <i>P</i> -value |
| Intercept                                                               | 4.65401    | 0.816 | 5.703   | ***             |
| High calorie food abundance                                             | 0.76890    | 0.120 | 6.407   | **              |
| Water depth                                                             | 2.49892    | 0.425 | 5.879   | 0.057           |

Model

| DR Frequency ~ High calorie food abundance + water depth + (RE: Months) |            |       |         |                 |
|-------------------------------------------------------------------------|------------|-------|---------|-----------------|
| Random effects                                                          |            | N     | Var     | SD              |
| Month                                                                   |            | 91    | 6.790   | 5.176           |
| Fixed effects                                                           | Estimative | SE    | z-value | <i>P</i> -value |
| Intercept                                                               | 3.73110    | 1.071 | 3.483   | **              |
| High calorie food abundance                                             | 0.88476    | 0.272 | 3.252   | ***             |
| Water depth                                                             | 0.97421    | 0.123 | 7.920   | **              |

## (b) Behavioral mean duration

| Model                                                                      |            |       |         |         |
|----------------------------------------------------------------------------|------------|-------|---------|---------|
| PU Mean Duartion ~ Low calorie food abundance + water depth + (RE: Months) |            |       |         |         |
| Random effects                                                             |            | N     | Var     | SD      |
| Month                                                                      |            | 91    | 2.877   | 1.696   |
| Fixed effects                                                              | Estimative | SE    | z-value | P-value |
| Intercept                                                                  | 1.20712    | 0.773 | 1.561   | ***     |
| Low calorie food abundance                                                 | 0.82465    | 0.237 | 3.479   | **      |
| Water depth                                                                | - 0.98731  | 0.280 | - 3.526 | **      |

| Model                                                                      |            |       |         |         |
|----------------------------------------------------------------------------|------------|-------|---------|---------|
| HD Mean Duration ~ Low calorie food abundance + water depth + (RE: Months) |            |       |         |         |
| Random effects                                                             |            | N     | Var     | SD      |
| Month                                                                      |            | 91    | 9.092   | 7.687   |
| Fixed effects                                                              | Estimative | SE    | z-value | P-value |
| Intercept                                                                  | 2.6385     | 1.169 | 2.257   | **      |
| Low calorie food abundance                                                 | 0.5778     | 0.231 | 2.501   | **      |
| Water depth                                                                | - 0.9108   | 0.506 | - 1.802 | **      |

| Model                                                                                                  |            |       |         |         |
|--------------------------------------------------------------------------------------------------------|------------|-------|---------|---------|
| FT Mean Duration ~ High calorie food abundance + water depth + temperature + pluviosity + (RE: Months) |            |       |         |         |
| Random effects                                                                                         |            | N     | Var     | SD      |
| Month                                                                                                  |            | 91    | 14.81   | 12.17   |
| Fixed effects                                                                                          | Estimative | SE    | z-value | P-value |
| Intercept                                                                                              | 3.5203     | 2.493 | 1.412   | **      |
| High calorie food abundance                                                                            | - 0.1711   | 0.082 | - 2.086 | ***     |
| Water depth                                                                                            | - 0.2424   | 0.091 | - 2.663 | **      |
| Temperature                                                                                            | 0.5665     | 0.431 | 1.314   | **      |
| Pluviosity                                                                                             | - 0.3886   | 0.314 | - 1.237 | ***     |

| Model                                                                                                  |            |       |         |         |
|--------------------------------------------------------------------------------------------------------|------------|-------|---------|---------|
| DR Mean Duration ~ High calorie food abundance + water depth + temperature + pluviosity + (RE: Months) |            |       |         |         |
| Random effects                                                                                         |            | N     | Var     | SD      |
| Month                                                                                                  |            | 91    | 16.342  | 6.081   |
| Fixed effects                                                                                          | Estimative | SE    | z-value | P-value |
| Intercept                                                                                              | 2.5643     | 1.908 | 1.343   | **      |
| High calorie food abundance                                                                            | - 0.2543   | 0.066 | - 3.853 | ***     |
| Water depth                                                                                            | - 0.3753   | 0.132 | - 2.843 | **      |
| Temperature                                                                                            | 0.2186     | 0.025 | 8.744   | **      |
| Pluviosity                                                                                             | - 0.1561   | 0.034 | - 4.591 | **      |

(c) Strolling mean duration

| Model                                                                                                                    |            |       |         |         |
|--------------------------------------------------------------------------------------------------------------------------|------------|-------|---------|---------|
| ST Mean Duration ~ High calorie food abundance + Low calorie food abundance + temperature +<br>pluviosity + (RE: Months) |            |       |         |         |
| Random effects                                                                                                           |            | N     | Var     | SD      |
| Month                                                                                                                    |            | 91    | 16.743  | 2.945   |
| Fixed effects                                                                                                            | Estimative | SE    | z-value | P-value |
| Intercept                                                                                                                | 3.3201     | 8.943 | 0.371   | ***     |
| Low calorie food abundance                                                                                               | - 5.2742   | 8.626 | - 0.611 | ***     |
| High calorie food abundance                                                                                              | 9.3461     | 3.397 | 2.750   | **      |
| Temperature                                                                                                              | 2.6738     | 1.706 | 1.567   | ***     |
| Pluviosity                                                                                                               | - 1.9912   | 3.617 | - 0.550 | **      |

(d) Mean individual distance

| Model                                                                                                |            |       |         |         |
|------------------------------------------------------------------------------------------------------|------------|-------|---------|---------|
| Mean Distance ~ Flock size + High calorie food abundance + Low calorie food abundance + (RE: Months) |            |       |         |         |
| Random effects                                                                                       |            | N     | Var     | SD      |
| Month                                                                                                |            | 91    | 11.210  | 3.348   |
| Fixed effects                                                                                        | Estimative | SE    | z-value | P-value |
| Intercept                                                                                            | 2.9281     | 5.378 | 0.544   | 0.588   |
| Low calorie food abundance                                                                           | - 2.4092   | 1.147 | - 2.104 | **      |
| High calorie food abundance                                                                          | 5.3089     | 2.481 | 2.139   | **      |
| Flock size                                                                                           | 0.5909     | 0.192 | 3.077   | **      |
